# Supplementary material for: Survival, Treatment Outcome, and Safety of Multiple and Repeated Courses of Stereotactic Body Radiotherapy for Pulmonary Oligometastases of Head and Neck Squamous Cell Carcinoma
Source: MDPI journal article supplement (doi:10.3390/cancers15215253), 2023-11-01
Supplement: s1 [file s1]

**Table S1.** Patient, lesions, and treatment characteristics of repeated courses of SBRT.

| Characteristic                                              |                    | Value or Ndo. (%)  |
|-------------------------------------------------------------|--------------------|--------------------|
| Total no. of patients                                       |                    | 17                 |
| Total no. of metastases                                     |                    | 46                 |
| Median age at start of SBRT (range)                         |                    | 68 (44-79)         |
| Sex                                                         | Male               | 15 (88.2%)         |
|                                                             | Female             | 2 (11.8%)          |
| Performance Status                                          | 0                  | 8 (47.1%)          |
|                                                             | 1                  | 4 (23.5%)          |
|                                                             | 2                  | 5 (29.4%)          |
| Pack years                                                  | Not available      | 1 (5.9%)           |
|                                                             | 0                  | 1 (5.9%)           |
|                                                             | < 10               | 0                  |
|                                                             | 10-20              | 4 (23.5%)          |
|                                                             | > 20               | 11 (64.7%)         |
| Primary tumour location                                     | Hypopharynx        | 2 (11.8%)          |
|                                                             | Larynx             | 4 (23.5%)          |
|                                                             | Nasopharynx        | 2 (11.8%)          |
|                                                             | Oral cavity        | 2 (11.8%)          |
|                                                             | Oropharynx         | 7 (41.2%)          |
| AJCC tumour classification (valid at the time of diagnosis) | T1                 | 1 (5.9%)           |
|                                                             | T2                 | 6 (35.3%)          |
|                                                             | T3                 | 5 (29.4%)          |
|                                                             | T4                 | 5 (29.4%)          |
| AJCC nodal classification (valid at the time of diagnosis)  | N0                 | 3 (17.6%)          |
|                                                             | N1                 | 3 (17.6%)          |
|                                                             | N2                 | 10 (58.8%)         |
|                                                             | N3                 | 1 (5.9%)           |
| Primary treatment                                           | Surgery            | 1 (5.9%)           |
|                                                             | Surgery + RT       | 5 (29.4%)          |
|                                                             | Surgery + RCHT     | 4 (23.5%)          |
|                                                             | RCHT               | 7 (41.2%)          |
| Metastasis timing                                           | Metachronous       | 15 (88.2%)         |
|                                                             | Synchronous        | 2 (11.8%)          |
| Number of different SBRT                                    | 2                  | 15 (88.2%)         |
|                                                             | 3                  | 2 (11.8%)          |
| Treated Lesions                                             |                    | 46                 |
|                                                             | 1 Lesions per SBRT | 29 (63.1%)         |
|                                                             | 2 Lesions per SBRT | 5 (=10) (21.7%)    |
|                                                             | 3 Lesions per SBRT | 1 (=3) 6.5%)       |
|                                                             | 4 Lesions per SBRT | 1 (=4) (8.7%)      |
| Laterality                                                  | Left lower lobe    | 16 (15.5%)         |
|                                                             | Left upper lobe    | 23 (22.3%)         |
|                                                             | Right lower lobe   | 23 (22.3%)         |
|                                                             | Right middle lobe  | 10 (9.7%)          |
|                                                             | Right upper lobe   | 31 (30.1%)         |
| Median clinical tumour volume, cm <sup>3</sup> (range)      |                    | 3,21 (0.17; 49.62) |

|                                  |       |            |
|----------------------------------|-------|------------|
| <b>Dose, Gy/fraction number</b>  | 60/10 | 14 (13.6%) |
|                                  | 48/6  | 20 (19.4%) |
|                                  | 45/3  | 69 (67%)   |
| <b>Adjuvant systemic therapy</b> |       |            |
| <b>in total</b>                  |       | 6 (35.3%)  |
| <b>of which:</b>                 |       |            |
| CHT + ICI                        |       | 2 (11.8%)  |
| CHT + Cetuximab + ICI            |       | 1 (5.9%)   |
| ICI alone                        |       | 3 (17.6%)  |

RCHT: radiochemotherapy; RT: radiotherapy; ICI: immune checkpoint inhibitor; CHT: chemotherapy (various combinations of Cisplatin, Carboplatin, 5-FU, Docetaxel, and Methotrexat).
